# Supplementary material for: Beneficial Effects of Essential Oils from the Mediterranean Diet on Gut Microbiota and Their Metabolites in Ischemic Heart Disease and Type-2 Diabetes Mellitus
Source: MDPI journal article supplement (doi:10.3390/nu14214650), 2022-11-03
Supplement: s1 [file s1]

**Table S1.** Experimental diet used in animals

| Crude Nutrients                 | %    | Additives                   | Per kg |
|---------------------------------|------|-----------------------------|--------|
| Crude Protein                   | 22.0 | Vitamin A [IU]              | 15,000 |
| Crude fat                       | 23.6 | Vitamin D <sub>3</sub> [IU] | 1,500  |
| Crude fibre                     | 5.7  | Vitamin E [mg]              | 150    |
| Crude ash                       | 5.4  | Vitamin C [mg]              | 30     |
| Starch                          | 6.8  |                             |        |
| Sugar                           | 21.1 | Copper [mg]                 | 12     |
| Energy: 19.3 MJ [or kcal] ME/kg |      |                             |        |
