# Supplementary material for: Beneficial Effects of Essential Oils from the Mediterranean Diet on Gut Microbiota and Their Metabolites in Ischemic Heart Disease and Type-2 Diabetes Mellitus
Source: MDPI journal article supplement (doi:10.3390/nu14214650), 2022-11-03
Supplement: s1 [file s1]

**Table S2.** Correlation analysis between gut microbial abundance and plasma levels of cytokines and chemokines

|                       | Phylum      |        |         | Family                                 |                  |                 | Genus                                                           |                            |                          |
|-----------------------|-------------|--------|---------|----------------------------------------|------------------|-----------------|-----------------------------------------------------------------|----------------------------|--------------------------|
|                       | Name        | rho    | p-value | Name                                   | rho              | p-value         | Name                                                            | rho                        | p-value                  |
| IL1β (pg/mL)          |             |        |         | Oxalobacteraceae                       | -0.455           | 0.009*          |                                                                 |                            |                          |
| IL5 (pg/mL)           |             |        |         |                                        |                  |                 | <i>Desulfovibrio</i>                                            | +0.376                     | 0.034                    |
| IL6 (pg/mL)           |             |        |         | Alcaligenaceae                         | +0.418           | 0.017           | <i>Desulfovibrio</i><br><i>Pigmentiphaga</i>                    | +0.364<br>+0.383           | 0.041<br>0.030           |
| IL9 (pg/mL)           | Firmicutes  | -0.399 | 0.024   | Lachnospiraceae                        | -0.350           | 0.049           | <i>Oscillospira</i>                                             | -0.381                     | 0.032                    |
| IL10 (pg/mL)          |             |        |         |                                        |                  |                 | <i>Sutterella</i>                                               | -0.383                     | 0.031                    |
| IL13 (pg/mL)          |             |        |         | Barnesiellaceae                        | -0.363           | 0.041           | <i>Barnesiella</i>                                              | -0.363                     | 0.041                    |
| IL17A (CTLA8) (pg/mL) |             |        |         | Paraprevotellaceae                     | +0.401           | 0.023           | <i>Paraprevotella</i>                                           | +0.401                     | 0.023                    |
| IL18 (pg/mL)          | Firmicutes  | -0.407 | 0.021   | Turicibacteraceae                      | -0.415           | 0.018           | <i>Turicibacter</i>                                             | -0.415                     | 0.018                    |
| IL22 (pg/mL)          |             |        |         |                                        |                  |                 | <i>Clostridium</i>                                              | +0.467                     | 0.007*                   |
| IL23 (pg/mL)          |             |        |         | Oxalobacteraceae                       | +0.378           | 0.033           |                                                                 |                            |                          |
| TNFα (pg/mL)          |             |        |         | Rikenellaceae                          | -0.363           | 0.041           | <i>Alistipes</i>                                                | -0.380                     | 0.032                    |
| GM-CSF (pg/mL)        |             |        |         | Lactobacillaceae                       | -0.526           | 0.002*          | <i>Lactobacillus</i>                                            | -0.526                     | 0.002*                   |
| MIP2a (CXCL2) (pg/mL) | Firmicutes  | -0.427 | 0.015   | Ruminococcaceae<br>Desulfovibrionaceae | -0.461<br>-0.371 | 0.008*<br>0.031 | <i>Oscillospira</i><br><i>Bilophila</i>                         | -0.464<br>-0.458           | 0.007*<br>0.008*         |
| IP10 (CXCL10) (pg/mL) | Tenericutes | -0.376 | 0.034   | Anaeroplasmataceae                     | -0.376           | 0.034           | <i>Oscillospira</i><br><i>Anaeroplasma</i>                      | -0.351<br>-0.376           | 0.049<br>0.034           |
| MIP1b (CCL4) (pg/mL)  |             |        |         | Rikenellaceae                          | -0.366           | 0.039           |                                                                 |                            |                          |
| MCP3 (CCL7) (pg/mL)   | Firmicutes  | -0.450 | 0.010   | Ruminococcaceae                        | -0.430           | 0.014           | <i>Desulfovibrio</i><br><i>Oscillospira</i><br><i>Bilophila</i> | -0.361<br>-0.492<br>-0.441 | 0.042<br>0.004*<br>0.012 |

**Abbreviations:** rho, Spearman correlation coefficient.  
P-values were adjusted for multiple testing correlations; (\*) denotes significant adjusted p<0.05.
