# Supplementary material for: Beneficial Effects of Essential Oils from the Mediterranean Diet on Gut Microbiota and Their Metabolites in Ischemic Heart Disease and Type-2 Diabetes Mellitus
Source: MDPI journal article supplement (doi:10.3390/nu14214650), 2022-11-03
Supplement: s1 [file s1]

**Table S3.** Correlation analysis between gut microbial abundance and plasma levels of AAS, GGS and pentosidine

|                        | AAS        |                | GGS        |                | Pentosidine |                |
|------------------------|------------|----------------|------------|----------------|-------------|----------------|
|                        | r          | p-value        | r          | p-value        | r           | p-value        |
| <b>AAS</b>             | 1          | ---            | +0.250     | 0.154          | +0.352      | 0.041          |
| <b>GGS</b>             | +0.250     | 0.154          | 1          | ---            | -0.014      | 0.936          |
| <b>Pentosidine</b>     | +0.352     | 0.041          | -0.014     | 0.936          | 1           | ---            |
| <b>Phylum</b>          | <b>rho</b> | <b>p-value</b> | <b>rho</b> | <b>p-value</b> | <b>rho</b>  | <b>p-value</b> |
| Bacteroidetes          | -0.270     | 0.129          | -0.367     | 0.035          | -0.096      | 0.596          |
| Firmicutes             | -0.440     | 0.010          | -0.397     | 0.022          | -0.068      | 0.705          |
| Lentisphaerae          | -0.153     | 0.394          | -0.269     | 0.131          | -0.381      | 0.029          |
| Proteobacteria         | -0.362     | 0.038          | -0.208     | 0.246          | -0.068      | 0.707          |
| <b>Family</b>          | <b>rho</b> | <b>p-value</b> | <b>rho</b> | <b>p-value</b> | <b>rho</b>  | <b>p-value</b> |
| Bacteroidacea          | -0.386     | 0.026          | -0.370     | 0.034          | -0.206      | 0.250          |
| Porphyromonadaceae     | -0.330     | 0.061          | -0.412     | 0.017          | -0.377      | 0.031          |
| Barnesiellaceae        | -0.155     | 0.389          | -0.558     | 0.001*         | -0.018      | 0.922          |
| Odoribacteraceae       | -0.081     | 0.655          | -0.388     | 0.026          | -0.118      | 0.512          |
| Paraprevotellaceae     | -0.465     | 0.006*         | -0.078     | 0.665          | -0.235      | 0.188          |
| Lactobacillaceae       | -0.271     | 0.127          | -0.499     | 0.003*         | -0.336      | 0.056          |
| Ruminococcaceae        | -0.378     | 0.030          | -0.104     | 0.566          | -0.023      | 0.898          |
| Victivallaceae         | -0.153     | 0.394          | -0.269     | 0.131          | -0.381      | 0.029          |
| Alcaligenaceae         | -0.418     | 0.016          | -0.183     | 0.309          | -0.284      | 0.109          |
| <b>Genus</b>           | <b>rho</b> | <b>p-value</b> | <b>rho</b> | <b>p-value</b> | <b>rho</b>  | <b>p-value</b> |
| <i>Bacteroides</i>     | -0.386     | 0.026          | -0.370     | 0.034          | -0.206      | 0.250          |
| <i>Parabacteroides</i> | -0.330     | 0.061          | -0.412     | 0.017          | -0.377      | 0.031          |
| <i>Barnesiella</i>     | -0.150     | 0.405          | -0.560     | 0.001*         | -0.007      | 0.970          |
| <i>Butyrlicimonas</i>  | -0.081     | 0.655          | -0.388     | 0.026          | -0.118      | 0.512          |
| <i>Paraprevotella</i>  | -0.465     | 0.006*         | -0.078     | 0.665          | -0.235      | 0.188          |
| <i>Lactobacillus</i>   | -0.271     | 0.127          | -0.499     | 0.003*         | -0.336      | 0.056          |
| <i>Victivallis</i>     | -0.153     | 0.394          | -0.269     | 0.131          | -0.381      | 0.029          |
| <i>Pigmentiphaga</i>   | -0.379     | 0.030          | -0.192     | 0.284          | -0.259      | 0.146          |

**Abbreviations:** AAS, alpha-aminoadipic semialdehyde; GGS, gamma-glutamic semialdehyde; r, Pearson correlation coefficient; rho, Spearman correlation coefficient. P-values were adjusted for multiple testing correlations: (\*) denotes significant adjusted p<0.05.
